# Supplementary material for: Extracorporeal carbon dioxide removal in acute hypoxaemic respiratory failure: a systematic review, Bayesian meta-analysis and trial sequential analysis
Source: PubMed Central journal article supplement — Eur Respir Rev. 2022 Nov 16;31(166):220030. doi: 10.1183/16000617.0030-2022 (PMC9724795; doi:10.1183/16000617.0030-2022), 2022-11-16
Supplement: ERR-0030-2022.SUPPLEMENT.pdf [file ERR-0030-2022.SUPPLEMENT.pdf]

# **Extracorporeal carbon dioxide removal in acute hypoxaemic respiratory failure: a systematic review, Bayesian meta-analysis, and trial sequential analysis.**

JE Millar, AJ Boyle, TM Drake, CE Adams, AW Glass, B Blackwood, JJ McNamee, DF McAuley

## **Supplementary Material**

|                         |                                                                                                                                  |
|-------------------------|----------------------------------------------------------------------------------------------------------------------------------|
| Supplementary File 1.   | A summary of clinical studies published between 1946 and 1 <sup>st</sup> January 1994                                            |
| Supplementary File 2.   | Search strategy                                                                                                                  |
| Supplementary Table 1.  | Technical details of ECCO <sub>2</sub> R, management strategies, and anticoagulation protocols for randomised controlled trials. |
| Supplementary Table 2.  | Risk of bias rationale for randomised controlled trials                                                                          |
| Supplementary Table 3.  | Baseline characteristics of included observational studies                                                                       |
| Supplementary Table 4.  | Clinical outcome measures for ECCO <sub>2</sub> R reported by observational studies                                              |
| Supplementary Table 5.  | ROBINS-I rationale for risk of bias in observational studies                                                                     |
| Supplementary Table 6.  | Primary outcome (mortality up to day 30 (or latest)) sensitivity analysis                                                        |
| Supplementary Table 7.  | Safety and adverse events summary                                                                                                |
| Supplementary Table 8.  | Summary of physiological changes reported by included studies                                                                    |
| Supplementary Table 9.  | Ongoing clinical trials of ECCO <sub>2</sub> R in acute hypoxaemic respiratory failure                                           |
| Supplementary Figure 1. | Inclusion diagram                                                                                                                |
| Supplementary Figure 2. | Risk of bias assessment for observational studies                                                                                |
| Supplementary Figure 3. | Forest plots for secondary outcomes                                                                                              |
| Supplementary Figure 4. | Trial sequential analysis assuming ARR $\geq$ 5%                                                                                 |

**Supplementary File 1.** A summary of clinical studies published between 1946 and 1<sup>st</sup> January 1994

| <b>Authors</b>                                 | <b>Year</b> | <b>Title</b>                                                                                                                                                                               | <b>Journal</b>                   | <b>Notes</b>                                                                                            |
|------------------------------------------------|-------------|--------------------------------------------------------------------------------------------------------------------------------------------------------------------------------------------|----------------------------------|---------------------------------------------------------------------------------------------------------|
| Gattinoni L, Kolobow T, Agostini A, et al.     | 1979        | Clinical application of low frequency positive pressure ventilation with extracorporeal CO <sub>2</sub> removal (LFPPV-ECCO2R) in treatment of adult respiratory distress syndrome (ARDS). | Int J Artif Organs               | <i>Case report. Earliest article identified.</i>                                                        |
| Gattinoni L, Pesenti A, Pelizzola A, et al.    | 1981        | Reversal of terminal acute respiratory failure by low frequency positive pressure ventilation with extracorporeal removal of CO <sub>2</sub> (LFPPV-ECCO2R).                               | Trans Am Soc Artif Intern Organs |                                                                                                         |
| Pesenti A, Pelizzola A, Mascheroni D, et al.   | 1981        | Low frequency positive pressure ventilation with extracorporeal CO <sub>2</sub> removal (LEPPV-ECCO2R) in acute respiratory failure (ARF): technique.                                      | Trans Am Soc Artif Intern Organs |                                                                                                         |
| Gattinoni L, Pesenti A, Pelizzola A.           | 1982        | Extracorporeal carbon dioxide removal in acute respiratory failure.                                                                                                                        | Ann Chir Gynaecol                |                                                                                                         |
| Agostini A, Cicardi M, Bergamaschini L, et al. | 1983        | Complement activation in adult respiratory distress syndrome treated with long-term extracorporeal CO <sub>2</sub> removal.                                                                | Trans Am Soc Artif Intern Organs |                                                                                                         |
| Gattinoni L, Pesenti A, Caspani ML, et al.     | 1984        | The role of total static lung compliance in the management of severe ARDS unresponsive to conventional treatment.                                                                          | Intensive Care Med               | <i>Nineteen patients supported with ECCO2R. The basis for the technique employed by Morris, et al..</i> |
| Gardinali M, Cicardi M, Frangi D, et al.       | 1985        | Studies of complement activation in ARDS patients treated by long-term extracorporeal CO <sub>2</sub> removal.                                                                             | Int J Artif Organs               |                                                                                                         |
| Peters J, Radermacher P, Pesenti A, et al.     | 1985        | Tracheal and alveolar gas composition during low-frequency positive pressure ventilation with extracorporeal CO <sub>2</sub> -removal (LFPPV-ECCO2R).                                      | Intensive Care Med               |                                                                                                         |
| Solca M, Pesenti A, Iapichino G, et al.        | 1985        | Multidisciplinary approach to extracorporeal respiratory assist for acute pulmonary failure.                                                                                               | Int Surg                         |                                                                                                         |
| Thies WR, Breulmann M, Lehnsen U.              | 1985        | Lung function during successful 10-day extracorporeal CO <sub>2</sub> removal in acute lung injury: Case report.                                                                           | Anaesthetist                     |                                                                                                         |
| Gattinoni L, Pesenti A, Mascheroni D, et al.   | 1986        | Low-frequency positive-pressure ventilation with extracorporeal CO <sub>2</sub> removal in severe acute respiratory failure                                                                | JAMA                             | <i>Forty-three patient un-controlled trial.</i>                                                         |
| Hickling KG, Downward G, Davis F, et al.       | 1986        | Management of severe ARDS with low frequency positive pressure ventilation and extracorporeal CO <sub>2</sub> removal.                                                                     | Anaesth Intensive Care           |                                                                                                         |
| Marcolin R, Mascheroni D, Pesenti A, et al.    | 1986        | Ventilatory impact of partial extracorporeal CO <sub>2</sub> removal (PECOR) in ARF patients.                                                                                              | ASAIO Trans                      |                                                                                                         |
| Krajewski S, Seltz RJ, Schober R.              | 1987        | Prolonged extracorporeal CO <sub>2</sub> - Removal in severe adult respiratory distress syndrome. Neuropathological observations in two cases.                                             | Intensive Care Med               |                                                                                                         |
| Peters J, Rademacher P, Kuntz ME, et al.       | 1988        | Extracorporeal CO <sub>2</sub> -removal with a heparin coated artificial lung.                                                                                                             | Intensive Care Med               |                                                                                                         |
| Abrams JH, Gilmour IJ, Kriett JM, et al.       | 1990        | Low-frequency positive-pressure ventilation with extracorporeal carbon dioxide removal                                                                                                     | Crit Care Med                    |                                                                                                         |
| Pesenti A, Rossi GP, Pelosi P, et al.          | 1990        | Percutaneous extracorporeal CO <sub>2</sub> removal in a patient with bullous emphysema with recurrent bilateral pneumothoraces and respiratory failure.                                   | Anesthesiology                   |                                                                                                         |
| Rossaint R, Slama K, Bauer R, et al.           | 1990        | Extracorporeal CO <sub>2</sub> -removal with a heparin coated extracorporeal system.                                                                                                       | Intensive Care Med               |                                                                                                         |

|                                           |      |                                                                                                                                                                                                                                 |                               |                                                                                                        |
|-------------------------------------------|------|---------------------------------------------------------------------------------------------------------------------------------------------------------------------------------------------------------------------------------|-------------------------------|--------------------------------------------------------------------------------------------------------|
| Wagner PK, Knoch M, Sangmeister C, et al. | 1990 | Extracorporeal gas exchange in adult respiratory distress syndrome: associated morbidity and its surgical treatment.                                                                                                            | Br J Surg                     |                                                                                                        |
| Bindslev L, Bohm C, Jolin A, et al.       | 1991 | Extracorporeal carbon dioxide removal performed with surface-heparinized equipment in patients with ARDS.                                                                                                                       | Acta Anaesthesiol Scand Suppl |                                                                                                        |
| Hoffmann BH, Bohm SH, Morris AH, et al.   | 1991 | In vivo demonstration of the Haldane effect during extracorporeal gas exchange.                                                                                                                                                 | Int J Artif Organs            |                                                                                                        |
| Kee SS, Sedgwick J, Bristow A.            | 1991 | Interhospital transfer of a patient undergoing extracorporeal carbon dioxide removal.                                                                                                                                           | Br J Anaesth                  |                                                                                                        |
| Kropf J, Grobe E, Knoch M, et al.         | 1991 | The prognostic value of extracellular matrix component concentrations in serum during treatment of adult respiratory distress syndrome with extracorporeal CO <sub>2</sub> removal.                                             | Eur J Clin Chem Clin Biochem  |                                                                                                        |
| Brunet F, Mira JP, Belghith M, et al.     | 1992 | Effects of aprotinin on hemorrhagic complications in ARDS patients during prolonged extracorporeal CO <sub>2</sub> removal.                                                                                                     | Intensive Care Med            |                                                                                                        |
| Knoch M, Kollen B, Dietrich G, et al.     | 1992 | Progress in veno-venous long-term bypass techniques for the treatment of ARDS. Controlled clinical trial with the heparin-coated bypass circuit.                                                                                | Int J Artif Organs            | <i>RCT of 18 patients, comparing heparin coated and non-heparin coated ECCO<sub>2</sub>R circuits.</i> |
| Ryan DP, Doody SP.                        | 1992 | Treatment of acute pulmonary failure with extracorporeal support: 100% survival in a pediatric population.                                                                                                                      | J Pediatr Surg                |                                                                                                        |
| Brunet F, Belghith M, Mira JP, et al.     | 1993 | Extracorporeal carbon dioxide removal and low-frequency positive-pressure ventilation. Improvement in arterial oxygenation with reduction of risk of pulmonary barotrauma in patients with adult respiratory distress syndrome. | Chest                         |                                                                                                        |

## Supplementary File 2. Search strategy

Ovid MEDLINE and Epub Ahead of Print, In-Process & Other Non-Indexed Citations

1946 – November 30<sup>th</sup>, 2021.

AND

Embase Classic + Embase

1947 – December 31<sup>st</sup>, 2021

- 1 “interventional lung assist\*” .mp.
- 2 (extracorporeal adj (CO2 or “carbon dioxide”) adj removal).mp.
- 3 ILA\* .mp.
- 4 novalung\* .mp.
- 5 PECLA\* .mp.
- 6 “percutaneous extracorporeal lung assist\*” .mp.
- 7 “partial extracorporeal support\*” .mp.
- 8 ((“carbon dioxide” or CO2) adj dialysis\*) .mp.
- 9 ECCO2R\* .mp.
- 10 “low flow ECCO2R\*” .mp
- 11 1 or 2 or 3 or 4 or 5 or 6 or 7 or 8 or 9 or 10
- 12 Exp Respiratory Distress Syndrome, Adult/
- 13 “respiratory failure” .mp
- 14 “acute lung injury” .mp.
- 15 12 or 13 or 14
- 16 11 and 15
- 17 limit 16 to humans

**Supplementary Table 1.** Technical details of ECCO<sub>2</sub>R, management strategies, and anticoagulation protocols

|                                                        | <b>Morris, et al., 1994</b> <sup>[17]</sup>                                                                                                                                                                             | <b>Bein, et al., 2013</b> <sup>[18]</sup>                                                                                                                                                                                   | <b>McNamee, et al., 2021</b> <sup>[8]</sup>                                                                                                                                                                                                                                                                   |
|--------------------------------------------------------|-------------------------------------------------------------------------------------------------------------------------------------------------------------------------------------------------------------------------|-----------------------------------------------------------------------------------------------------------------------------------------------------------------------------------------------------------------------------|---------------------------------------------------------------------------------------------------------------------------------------------------------------------------------------------------------------------------------------------------------------------------------------------------------------|
| <b>Mode of ECCO<sub>2</sub>R</b>                       | Veno-venous                                                                                                                                                                                                             | Arterio-venous                                                                                                                                                                                                              | Veno-venous                                                                                                                                                                                                                                                                                                   |
| <b>Model and manufacturer of ECCO<sub>2</sub>R</b>     | Roller pump and two Sci Med 3.5 m <sup>2</sup> membrane lungs (ML) in series <sup>a</sup>                                                                                                                               | iLA, Novalung, Heilbronn, Germany                                                                                                                                                                                           | Hemolung-RAS, ALung, Pittsburgh, USA                                                                                                                                                                                                                                                                          |
| <b>Cannula(e) type</b>                                 | NR <sup>b</sup>                                                                                                                                                                                                         | Arterial cannula (≤ 15 Fr)<br>Venous cannula (typically 2 sizes larger than arterial)                                                                                                                                       | Dual-lumen cannula (15.5 Fr)                                                                                                                                                                                                                                                                                  |
| <b>Cannula(e) site</b>                                 | NR <sup>b</sup>                                                                                                                                                                                                         | Femoral artery and contralateral femoral vein.                                                                                                                                                                              | Right internal jugular vein or any femoral vein.                                                                                                                                                                                                                                                              |
| <b>Flow settings</b>                                   | ~2.4 L/min                                                                                                                                                                                                              | ~1 – 2 L/min                                                                                                                                                                                                                | 350 – 500 mL/min                                                                                                                                                                                                                                                                                              |
| <b>Sweep gas settings</b>                              | 15 L/min per ML <sup>b</sup>                                                                                                                                                                                            | Stepwise increase to 10 L/min <sup>c</sup>                                                                                                                                                                                  | Started at 1 L/min.<br>Increased in 1-2 L/min increments until:<br>• pH ≥ 7.2<br>• V <sub>T</sub> ≤ 3 mL/kg PBW<br>• Pplat ≤ 25 cmH <sub>2</sub> O<br>Maximum 10 L/min.                                                                                                                                       |
| <b>Weaning strategy</b>                                | When:<br>• On CPAP ventilation<br>• F <sub>I</sub> O <sub>2</sub> 0.4<br>• PEEP 10 – 15 cmH <sub>2</sub> O<br>Or,<br>• On low-frequency IMV for ≥ 6 hours with no sweep gas flow<br>Then, may decannulate. <sup>b</sup> | When:<br>• F <sub>I</sub> O <sub>2</sub> < 0.5<br>• PEEP ≤ 12 cmH <sub>2</sub> O<br>• On an assisted spontaneous breathing ventilator mode<br>Then, reduce sweep gas to 1 L/min.<br>If stable for 2 hours, may decannulate. | When:<br>• Signs of clinical improvement<br>• PaO <sub>2</sub> /F <sub>I</sub> O <sub>2</sub> ≥ 225 mmHg<br>• Pplat ≤ 25 cmH <sub>2</sub> O during trial of V <sub>T</sub> 6 mL/kg PBW<br>Then, reduce sweep gas in 1 L/min increments until at 1L/min.<br>If stable at 1L/min for 12 hours, may decannulate. |
| <b>Anticoagulant</b>                                   | Unfractionated heparin                                                                                                                                                                                                  | Unfractionated heparin                                                                                                                                                                                                      | Unfractionated heparin                                                                                                                                                                                                                                                                                        |
| <b>Anticoagulation target</b>                          | ACT 180 – 210 s; APTTr 1.8 – 2.5                                                                                                                                                                                        | PTT 40 – 50 s                                                                                                                                                                                                               | APTTTr 1.5-2.0                                                                                                                                                                                                                                                                                                |
| <b>Duration of ECCO<sub>2</sub>R<sup>d</sup>, days</b> | 9 ± 2                                                                                                                                                                                                                   | 7 ± 4                                                                                                                                                                                                                       | 4 ± 2                                                                                                                                                                                                                                                                                                         |

for randomised controlled trials.

| Adjunctive therapies, % ECCO <sub>2</sub> R vs. standard care |    |    |                        |
|---------------------------------------------------------------|----|----|------------------------|
| Prone position                                                | NR | NR | 8 vs. 8 <sup>c</sup>   |
| Neuromuscular blockade                                        | NR | NR | 52 vs. 33 <sup>e</sup> |
| Inhaled nitric oxide                                          | NR | NR | 3 vs. 2 <sup>e</sup>   |

<sup>a</sup> – Device was investigator-designed. The pump type was not described in the trial manuscript but was referenced as being as *Gattinoni, et al, 1984*.

<sup>b</sup> – These details were not reported in the trial manuscript. However, *Gattinoni, et al., 1986*, describes cannulation of the IVC via the femoral vein for venous access and cannulation of the SVC via the right internal jugular vein for venous return, or dual-lumen cannulation of the IVC via the femoral vein, or saphenous-saphenous venous cannulation.

<sup>c</sup> – Sweep gas settings were not reported in the trial manuscript but were obtained from a published pilot trial.

<sup>d</sup> – Mean ± sd.

<sup>e</sup> – Day 3.

ACT – activated clotting time; APTTr – activated partial thromboplastin time ratio; CPAP – continuous positive airway pressure; ECCO<sub>2</sub>R – extracorporeal membrane oxygenation; F<sub>I</sub>O<sub>2</sub> – inspired fraction of oxygen; IMV – intermittent mandatory ventilation; NR – not reported; PaO<sub>2</sub>/F<sub>I</sub>O<sub>2</sub> – arterial partial pressure of oxygen to inspired fraction of oxygen ratio; PEEP – positive end expiratory pressure; Pplat – plateau airway pressure; V<sub>T</sub> – tidal volume.

**Supplementary Table 2.** Risk of bias rationale for randomised controlled trials.

|                                       | <b>Randomisation process</b>                                                                                                                                                                                                         | <b>Assignment to intervention</b>                                                                                                                                                                                                                                                                                                                                                                                                                                                                                                                      | <b>Missing outcome data</b>                                                                                                   | <b>Outcome measurement</b>      | <b>Selective outcome reporting</b>                          | <b>Other</b>                         |
|---------------------------------------|--------------------------------------------------------------------------------------------------------------------------------------------------------------------------------------------------------------------------------------|--------------------------------------------------------------------------------------------------------------------------------------------------------------------------------------------------------------------------------------------------------------------------------------------------------------------------------------------------------------------------------------------------------------------------------------------------------------------------------------------------------------------------------------------------------|-------------------------------------------------------------------------------------------------------------------------------|---------------------------------|-------------------------------------------------------------|--------------------------------------|
| <b>Morris, et al.</b> <sup>[17]</sup> | <i>Some concerns</i>                                                                                                                                                                                                                 | <i>Low</i>                                                                                                                                                                                                                                                                                                                                                                                                                                                                                                                                             | <i>Low</i>                                                                                                                    | <i>Low</i>                      | <i>Low</i>                                                  |                                      |
|                                       | Randomisation method not described. No good evidence that baseline imbalances suggest an issue with the randomisation process. However, ECCO <sub>2</sub> R patients had a significantly longer duration of illness at randomisation | Non-blinded. Two patients assigned to ECCO <sub>2</sub> R did not receive it (one died prior to initialisation and one recovered). Analysis was conducted on an intention-to-treat basis. Supportive care was highly protocolised with no evidence to suggest significant deviations from protocol.                                                                                                                                                                                                                                                    | No loss to follow-up.                                                                                                         | Non-blinded but binary outcome. | Mortality, length of stay, and adverse events reported.     | Trial stopped early due to futility. |
| <b>Bein, et al.</b> <sup>[18]</sup>   | <i>Low</i>                                                                                                                                                                                                                           | <i>Some concerns</i>                                                                                                                                                                                                                                                                                                                                                                                                                                                                                                                                   | <i>Low</i>                                                                                                                    | <i>Low</i>                      | <i>Some concerns</i>                                        |                                      |
|                                       | Telephone randomisation via a random number table generated by the trial statistician. Well balanced at randomisation.                                                                                                               | Non-blinded. All patients assigned to ECCO <sub>2</sub> R received it. The study did not protocolise supportive care. There were significant differences in the cumulative doses of sedatives between groups, which is known to mediate duration of mechanical ventilation.                                                                                                                                                                                                                                                                            | No loss to follow-up.                                                                                                         | Non-blinded but binary outcome. | Limited reporting of mortality outcomes and adverse events. | Trial stopped early due to futility. |
| <b>McNamee, et al.</b> <sup>[8]</sup> | <i>Low</i>                                                                                                                                                                                                                           | <i>Some concerns</i>                                                                                                                                                                                                                                                                                                                                                                                                                                                                                                                                   | <i>Low</i>                                                                                                                    | <i>Low</i>                      | <i>Low</i>                                                  |                                      |
|                                       | Online or telephone randomisation using a computer-generated schedule of variable block sizes. Well balanced at randomisation.                                                                                                       | Non-blinded. Seventeen (8%) patients assigned to ECCO <sub>2</sub> R did not receive it (8 improved, 6 had technical issues with ECCO <sub>2</sub> R, 2 deteriorated, 1 withdrew consent). One patient in the control group received ECCO <sub>2</sub> R. Analysis was conducted on an intention-to-treat basis. The study did not protocolise supportive care. There was a significantly higher use of neuromuscular blocking drugs and a lower rate of proning in the ECCO <sub>2</sub> R group, both of which are known to mediate outcome in AHRF. | A small number of patients were not included in the primary analysis. There is no evidence to suggest this biased the result. | Non-blinded but binary outcome. | Pre-published study protocol.                               | Trial stopped early due to futility. |

AHRF – acute hypoxaemic respiratory failure; ECCO<sub>2</sub>R – extracorporeal carbon dioxide removal.

|                                    | Year | Design               | Mode of ECCO <sub>2</sub> R | Co-intervention | Comparator          | n total | n ECCO <sub>2</sub> R <sup>a</sup> | Age, years <sup>b</sup> | Sex       | PaO <sub>2</sub> /F <sub>1</sub> O <sub>2</sub> ratio, mmHg <sup>b</sup> | Aetiology, % <sup>c</sup> | Notes             |
|------------------------------------|------|----------------------|-----------------------------|-----------------|---------------------|---------|------------------------------------|-------------------------|-----------|--------------------------------------------------------------------------|---------------------------|-------------------|
| Guinard, et al. <sup>[19]</sup>    | 1997 | Controlled trial     | VV                          |                 | MV                  | 36      | 8                                  | 35 ± 13                 | NR        | 74 ± 28                                                                  | Pneumonia (44)            |                   |
| Bein, et al. <sup>[20]</sup>       | 2006 | Retrospective cohort | AV                          |                 |                     | 90      | 90                                 | 44 (26 – 59)            | 21 F/69 M | 58 (47 – 78)                                                             | Pneumonia (33)            |                   |
| Terragni, et al. <sup>[21]</sup>   | 2009 | Controlled trial     | VV                          |                 | MV                  | 32      | 10                                 | 64 ± 14                 | 3 F/10 M  | 136 ± 30                                                                 | Pneumonia (34)            |                   |
| Zimmermann, et al. <sup>[22]</sup> | 2009 | Prospective cohort   | AV                          |                 |                     | 51      | 51                                 | 52 (40 – 59)            | 8 F/43 M  | 75 (62 – 130)                                                            | NR                        | Pilot study       |
| Lubnow, et al. <sup>[23]</sup>     | 2010 | Retrospective cohort | AV                          | HFOV            |                     | 21      | 21                                 | 51 (42 – 61)            | 5 F/16 M  | 61 (47 – 86)                                                             | Pneumonia (81)            |                   |
| Bein, et al. <sup>[24]</sup>       | 2011 | Matched cohort       | AV                          | Aspirin         | ECCO <sub>2</sub> R | 30      | 30                                 | 47 ± 7                  | 4 F/26 M  | 127 ± 56                                                                 | Trauma (43)               |                   |
| Neirhaus, et al. <sup>[25]</sup>   | 2011 | Retrospective cohort | AV                          |                 |                     | 13      | 13                                 | 52 ± 19                 | 5 F/8 M   | 100 ± 29                                                                 | Pneumonia (54)            |                   |
| Cho, et al. <sup>[26]</sup>        | 2012 | Prospective cohort   | AV                          |                 |                     | 11      | 11                                 | 58 ± 14                 | 3 F/8 M   | 110 ± 37                                                                 | Pneumonia (64)            |                   |
| Quintard, et al. <sup>[27]</sup>   | 2014 | Retrospective cohort | VV                          | CRRT            |                     | 16      | 16                                 | 59 ± 17                 | 9 F/7 M   | 133 ± 71                                                                 | Pneumonia (56)            | Novel device      |
| Weingart, et al. <sup>[28]</sup>   | 2015 | Retrospective cohort | AV                          |                 | VV-ECMO             | 255     | 63                                 | 50 ± 16                 | 12 F/51 M | 93 (66 – 153)                                                            | Pulmonary-ARDS (67)       |                   |
| Fanelli, et al. <sup>[29]</sup>    | 2016 | Prospective cohort   | VV                          |                 |                     | 15      | 15                                 | 55 ± 19                 | 4 F/11 M  | 159 ± 34                                                                 | Pneumonia (80%)           | Feasibility study |
| Fanelli, et al. <sup>[30]</sup>    | 2018 | Matched cohort       | VV                          | CRRT            | CRRT                | 54      | 14                                 | 60 ± 20                 | NR        | NR                                                                       | NR                        |                   |
| Combes, et al. <sup>[31]</sup>     | 2019 | Prospective cohort   | VV                          |                 |                     | 95      | 95                                 | 60 ± 14                 | 31 F/64 M | 173 ± 61                                                                 | Pneumonia (82)            | Pilot study       |
| Nentwich, et al. <sup>[32]</sup>   | 2019 | Prospective cohort   | VV                          | CRRT            |                     | 20      | 20                                 | 64 (43 – 82)            | 8 F/ 12 M | 159 ± 36                                                                 | Pneumonia (85)            | Pilot study       |
| Moerer, et al. <sup>[33]</sup>     | 2019 | Prospective cohort   | VV                          | CRRT            |                     | 14      | 11                                 | 61 ± 11                 | 4 F/7 M   | 211 ± 60                                                                 | Multiple <sup>d</sup>     |                   |
| Petren, et al. <sup>[34]</sup>     | 2020 | Retrospective cohort | AV                          |                 |                     | 73      | 73                                 | 51 ± 17                 | 28 F/45 M | 126 ± 59                                                                 | Pneumonia (60)            |                   |
| Goursand, et al. <sup>[35]</sup>   | 2021 | Quasi-experimental   | VV                          |                 |                     | 18      | 18                                 | 64 (57 – 76)            | 5 F/13 M  | 117 (100 – 136)                                                          | Pneumonia (83)            | Pilot study       |
| Ding, et al. <sup>[36]</sup>       | 2021 | Prospective cohort   | VV                          | CRRT            |                     | 12      | 12                                 | 68 (62 – 71)            | 6 F/6 M   | NR                                                                       | Covid-19 ARDS (100)       |                   |

**Supplementary Table 3.** Baseline characteristics of included observational studies.

<sup>a</sup> – number of patients who received ECCO<sub>2</sub>R and were analysed.

<sup>b</sup> – mean ± SD or median (IQR).

<sup>c</sup> – commonest reported aetiology of respiratory failure.

<sup>d</sup> – Two patients with ARDS, two with pneumonia, two with endocarditis, two with sepsis.

AHRF – acute hypoxaemic respiratory failure; ARDS – acute respiratory distress syndrome; AV – arterio-venous; Covid-19 – Coronavirus disease – 19; CRRT – continuous renal replacement therapy; ECCO<sub>2</sub>R – extracorporeal carbon dioxide removal; ECMO – extracorporeal membrane oxygenation; MV – mechanical ventilation; VV – veno-venous.





**Supplementary Table 4.** Clinical outcome measures for ECCO<sub>2</sub>R reported by observational studies.

|                                       | <i>n (%)</i>               |                      |                           | <i>mean ± SD or median (range)</i> |
|---------------------------------------|----------------------------|----------------------|---------------------------|------------------------------------|
|                                       | <b>28/30-day mortality</b> | <b>ICU mortality</b> | <b>Hospital mortality</b> | <b>ICU length of stay, days</b>    |
| Guinard, et al. <sup>[19]</sup>       | NR                         | NR                   | 6/8 (75)                  | NR                                 |
| Bein, et al., 2006 <sup>[20]</sup>    | NR                         | NR                   | 53/90 (58.9)              | NR                                 |
| Terragni, et al. <sup>[21]</sup>      | NR                         | NR                   | NR                        | NR                                 |
| Zimmermann, et al. <sup>[22]</sup>    | NR                         | NR                   | 25/51 (49)                | NR                                 |
| Lubnow, et al. <sup>[23]</sup>        | 9/21 (42.9) <sup>a</sup>   | NR                   | 12/21 (57.1)              | NR                                 |
| Bein, et al., 2011 <sup>[24]</sup>    | NR                         | NR                   | 1/15 (6.7)                | NR                                 |
| Neirhaus, et al. <sup>[25]</sup>      | NR                         | 7/13 (53.8)          | NR                        | 34.5 ± 65.3                        |
| Cho, et al. <sup>[26]</sup>           | NR                         | NR                   | NR                        | NR                                 |
| Quintard, et al. <sup>[27]</sup>      | NR                         | 7/16 (43.8)          | NR                        | 20.3 ± 10.7                        |
| Weingart, et al. <sup>[28]</sup>      | 30/63 (47.6) <sup>a</sup>  | NR                   | 35/63 (55.6)              | NR                                 |
| Fanelli, et al., 2016 <sup>[29]</sup> | 7/15 (46.7) <sup>b</sup>   | NR                   | NR                        | NR                                 |
| Fanelli, et al., 2018 <sup>[30]</sup> | NR                         | NR                   | NR                        | NR                                 |
| Combes, et al. <sup>[31]</sup>        | 26/95 (27.4) <sup>b</sup>  | NR                   | 36/95 (37.9)              | NR                                 |
| Nentwich, et al. <sup>[32]</sup>      | NR                         | NR                   | NR                        | NR                                 |
| Moerer, et al. <sup>[33]</sup>        | NR                         | NR                   | NR                        | NR                                 |
| Petren, et al. <sup>[34]</sup>        | NR                         | NR                   | 36/73 (49.3)              | NR                                 |
| Goursand, et al. <sup>[35]</sup>      | NR                         | NR                   | NR                        | NR                                 |
| Ding, et al. <sup>[36]</sup>          | 8/12                       | NR                   | NR                        | 21 (16 – 36)                       |

<sup>a</sup> – 30-day mortality

<sup>b</sup> – 28-day mortality

ICU – intensive care unit; NR – not reported.

**Supplementary Table 5.** ROBINS-I rationale for risk of bias in observational studies.

|                                  | <b>Confounding</b>                                                                 | <b>Selection of participants</b> | <b>Classification of interventions</b> | <b>Deviation from intervention</b>                                         | <b>Missing data</b>   | <b>Outcome measurement</b>                                                                                                                                 | <b>Selection of reported results</b>                                                                          |
|----------------------------------|------------------------------------------------------------------------------------|----------------------------------|----------------------------------------|----------------------------------------------------------------------------|-----------------------|------------------------------------------------------------------------------------------------------------------------------------------------------------|---------------------------------------------------------------------------------------------------------------|
| Guinard, et al. <sup>[19]</sup>  | <i>Serious</i>                                                                     | <i>Low</i>                       | <i>Low</i>                             | <i>Critical</i>                                                            | <i>No information</i> | <i>Low</i>                                                                                                                                                 | <i>Serious</i>                                                                                                |
|                                  | Only a small number of potential confounders accounted for in regression analysis. |                                  |                                        | Nine patients meeting criteria for ECCO <sub>2</sub> R did not receive it. |                       | Primary outcome was binary.                                                                                                                                | Secondary outcomes were not pre-specified.                                                                    |
| Terragni, et al. <sup>[21]</sup> | <i>Serious</i>                                                                     | <i>Low</i>                       | <i>Low</i>                             | <i>No information</i>                                                      | <i>No information</i> | <i>Moderate</i>                                                                                                                                            | <i>Serious</i>                                                                                                |
|                                  | Multiple confounding variables not controlled for.                                 |                                  |                                        |                                                                            |                       | Outcome measures only minimally influenced by knowledge of the intervention and any error in measurement is unlikely to be related to intervention status. | In recording multiple clinical, imaging, and biochemical results there is a high risk of selective reporting. |

**Supplementary Table 6.** Primary outcome (mortality up to day 30 (or latest)) sensitivity analysis.

|           | <b>Informative prior<sup>a</sup></b>                            |                                      | <b>Non-informative prior</b>                                    |                                      |
|-----------|-----------------------------------------------------------------|--------------------------------------|-----------------------------------------------------------------|--------------------------------------|
|           | <i>Mean posterior relative effect<sup>b</sup><br/>(95% CrI)</i> | <i>Heterogeneity (I<sup>2</sup>)</i> | <i>Mean posterior relative effect<sup>b</sup><br/>(95% CrI)</i> | <i>Heterogeneity (I<sup>2</sup>)</i> |
| Estimates | 1.19 (0.70 – 2.29)                                              | 41.5%                                | 1.10 (0.60 – 2.05)                                              | 68.8%                                |

<sup>a</sup> – Derived from the results of *Guinard, et al.*.

<sup>b</sup> - Relative risk.

CrI – credible interval.

|                                       | % of patients receiving ECCO <sub>2</sub> R [% of standard care group] |                                |                           |                                        |                |                                    |
|---------------------------------------|------------------------------------------------------------------------|--------------------------------|---------------------------|----------------------------------------|----------------|------------------------------------|
|                                       | ECCO <sub>2</sub> R mode                                               | Major haemorrhage <sup>a</sup> | Intracerebral haemorrhage | Cannulation complications <sup>b</sup> | Limb ischaemia | Circuit complications <sup>c</sup> |
| <b>Randomised controlled trials</b>   |                                                                        |                                |                           |                                        |                |                                    |
| Morris, et al. <sup>[17]</sup>        | VV                                                                     | 100 [0]                        | 5 [5]                     | NR                                     | 10             | 19                                 |
| Bein, et al., 2013 <sup>d [18]</sup>  | AV                                                                     | NR                             | NR                        | 5                                      | 2.5            | NR                                 |
| McNamee, et al. <sup>e [8]</sup>      | VV                                                                     | 8 [1]                          | 10 [1]                    | 4                                      | NR             | 4                                  |
| <b>Observational studies</b>          |                                                                        |                                |                           |                                        |                |                                    |
| Guinard, et al. <sup>[19]</sup>       | VV                                                                     | 25 [12.5]                      | 12.5 [0]                  | NR                                     | NR             | NR                                 |
| Bein, et al., 2006 <sup>[20]</sup>    | AV                                                                     | 1                              | 1                         | 7                                      | 10             | NR                                 |
| Terragni, et al. <sup>[21]</sup>      | VV                                                                     | 0 [0]                          | 0 [0]                     | 40                                     | 0 [0]          | 40                                 |
| Zimmermann, et al. <sup>[22]</sup>    | AV                                                                     | 6                              | NR                        | 6                                      | 6              | NR                                 |
| Lubnow, et al. <sup>[23]</sup>        | AV                                                                     | 10                             | 5                         | NR                                     | 14             | 14                                 |
| Bein, et al., 2011 <sup>[24]</sup>    | AV                                                                     | NR                             | NR                        | NR                                     | NR             | NR                                 |
| Neirhaus, et al. <sup>[25]</sup>      | AV                                                                     | NR                             | NR                        | 15                                     | NR             | NR                                 |
| Cho, et al. <sup>[26]</sup>           | AV                                                                     | 9                              | NR                        | 18                                     | NR             | 72                                 |
| Quintard, et al. <sup>[27]</sup>      | VV                                                                     | NR                             | NR                        | NR                                     | NR             | NR                                 |
| Weingart, et al. <sup>[28]</sup>      | AV                                                                     | NR                             | NR                        | NR                                     | NR             | 21                                 |
| Fanelli, et al., 2016 <sup>[29]</sup> | VV                                                                     | NR                             | NR                        | 7                                      | NR             | NR                                 |
| Fanelli, et al., 2018 <sup>[30]</sup> | VV                                                                     | NR                             | NR                        | NR                                     | NR             | NR                                 |
| Combes, et al. <sup>[31]</sup>        | VV                                                                     | 6                              | 1                         | 2                                      | NR             | 17                                 |
| Nentwich, et al. <sup>[32]</sup>      | VV                                                                     | NR                             | NR                        | NR                                     | NR             | NR                                 |
| Moerer, et al. <sup>[33]</sup>        | VV                                                                     | NR                             | NR                        | NR                                     | NR             | NR                                 |
| Petren, et al. <sup>[34]</sup>        | AV                                                                     | NR                             | 1                         | NR                                     | NR             | NR                                 |
| Goursand, et al. <sup>[35]</sup>      | VV                                                                     | 6                              | NR                        | NR                                     | NR             | 28                                 |
| Ding, et al. <sup>[36]</sup>          | VV                                                                     | NR                             | NR                        | NR                                     | NR             | NR                                 |

**Supplementary Table 7.** Safety and adverse events summary.

<sup>a</sup> – There were disparate definitions of major haemorrhage, and each study was classified as such if the authors report bleeding to be significant or serious.

<sup>b</sup> – Cannulation complications include; cannula-site haematoma or bleeding, false-aneurysm formation or vascular injury, and catheter displacement.

<sup>c</sup> – Circuit complications include; clotting, device failure, and infection.

<sup>d</sup> – *Bein, et al.*, did not report complications under a classification but did report a low rate of ECCO<sub>2</sub>R-related adverse events (n = 3). These are included under the appropriate headings.

<sup>e</sup> – *McNamee, et al.*, reported adverse events using an adverse and serious adverse event nomenclature. The rates above are for adverse events, which by definition include serious adverse events.

AV – arterio-venous; NR – not reported; VV – veno-venous.

**Supplementary Table 8.** Summary of physiological changes reported by included studies.

|                                       | Timepoint                                                                                           | PaCO <sub>2</sub> , mmHg  | pH                              | V <sub>T</sub> , mL/kg       | V <sub>E</sub> , L/min  | Pplat, cmH <sub>2</sub> O | PaO <sub>2</sub> /F <sub>I</sub> O <sub>2</sub> , mmHg |
|---------------------------------------|-----------------------------------------------------------------------------------------------------|---------------------------|---------------------------------|------------------------------|-------------------------|---------------------------|--------------------------------------------------------|
| <b>Randomised controlled trials</b>   |                                                                                                     |                           |                                 |                              |                         |                           |                                                        |
| Morris, et al. <sup>[17]</sup>        | Randomisation                                                                                       | NR                        | 7.36 ± 0.02                     | 8.9 ± 0.6                    | 15.0 ± 1.1              | 55 ± 3 <sup>a</sup>       | 63 ± 4                                                 |
|                                       | 3 – 6 hours                                                                                         | NR                        | NR                              | 3.0 ± 3.0                    | NR                      | 45 ± 2                    | NR                                                     |
| Bein, et al., 2013 <sup>[18]</sup>    | Randomisation                                                                                       | 57 ± 12                   | 7.34 ± 0.07                     | 5.9 ± 1.2                    | 9.9 ± 1.6               | 29 ± 5                    | 152 ± 37                                               |
|                                       | Day 3                                                                                               | NR                        | NR                              | NR <sup>b</sup>              | NR <sup>b</sup>         | NR                        | NR <sup>b</sup>                                        |
| McNamee, et al. <sup>[8]</sup>        | Randomisation                                                                                       | 54 (47 – 63)              | 7.30 (7.25 – 7.37)              | 6.3 (5.8 – 7.0)              | NR                      | 26 (26 – 30)              | 118 (96 – 13)                                          |
|                                       | Day 3                                                                                               | 61 ± 14                   | 7.32 ± 0.09                     | 4.4 ± 1.7                    | 7.6 ± 2.5               | 23 ± 5                    | 148 ± 49                                               |
| <b>Observational studies</b>          |                                                                                                     |                           |                                 |                              |                         |                           |                                                        |
| Guinard, et al. <sup>[19]</sup>       | <i>Physiological variables not reported on an ECCO<sub>2</sub>R vs. non-ECCO<sub>2</sub>R basis</i> |                           |                                 |                              |                         |                           |                                                        |
| Bein, et al., 2006 <sup>[20]</sup>    | Pre-ECCO <sub>2</sub> R                                                                             | 60 (48 – 80)              | 7.27 (7.18 – 7.36)              | 430 (360 – 540) <sup>c</sup> | 13.0 (10.0 – 16.4)      | 38 (35 – 40)              | 58 (47 – 78)                                           |
|                                       | 24 hours                                                                                            | 34 (30 – 39)              | 7.45 (7.41 – 7.50)              | 380 (320 – 470) <sup>c</sup> | 9.9 (8.0 – 14.8)        | 35 (31 – 39)              | 101 (74 – 142)                                         |
| Terragni, et al. <sup>[21]</sup>      | Baseline                                                                                            | 74 <sup>e,t</sup>         | 7.20 <sup>e,t</sup>             | 4.2 <sup>e,t</sup>           | NR                      | 24 <sup>e,t</sup>         | 122 <sup>e,t</sup>                                     |
|                                       | Day 3                                                                                               | 49 <sup>e,t</sup>         | 7.39 <sup>e,t</sup>             | 4.5 <sup>e,t</sup>           | NR                      | 23 <sup>e,t</sup>         | 217 <sup>e,t</sup>                                     |
| Zimmermann, et al. <sup>[22]</sup>    | Pre-ECCO <sub>2</sub> R                                                                             | 73 (61 – 86)              | 7.23 (7.16 – 7.30)              | 6.6 (5.3 – 7.2)              | 11.5 (9.3 – 12.5)       | 35 (31 – 38)              | 75 (62 – 130)                                          |
|                                       | 24 hours                                                                                            | 41 (34 – 48)              | 7.44 (7.37 – 7.49)              | 4.4 (3.4 – 5.4)              | 6.6 (5.5 – 8.3)         | 30 (26 – 34)              | 110 (86 – 160)                                         |
| Lubnow, et al. <sup>[23]</sup>        | Pre-ECCO <sub>2</sub> R                                                                             | 58 (50 – 70)              | 7.28 (7.16 – 7.36)              | NR                           | NR                      | 28 (24 – 31) <sup>d</sup> | 61 (47 – 86)                                           |
|                                       | 24 hours                                                                                            | 36 (32 – 42) <sup>e</sup> | 7.45 (7.36 – 7.54) <sup>e</sup> | HFOV                         |                         | 33 (29 – 34) <sup>d</sup> | 102 (71 – 135) <sup>e</sup>                            |
| Bein, et al., 2011 <sup>[24]</sup>    | <i>Physiological variables not reported for the overall cohort</i>                                  |                           |                                 |                              |                         |                           |                                                        |
| Neirhaus, et al. <sup>[25]</sup>      | Pre-ECCO <sub>2</sub> R                                                                             | 80 ± 23                   | 7.18 ± 0.22                     | 293 ± 94 <sup>c</sup>        | 10.2 ± 3.4              | 34 ± 3 <sup>e</sup>       | 100 ± 29                                               |
|                                       | Day 3                                                                                               | 50 ± 8                    | 7.41 ± 0.10                     | 178 ± 90 <sup>c</sup>        | 3.3 ± 2.4               | 27 ± 4 <sup>e</sup>       | 152 ± 55                                               |
| Cho, et al. <sup>[26]</sup>           | Pre-ECCO <sub>2</sub> R                                                                             | 84 ± 23                   | 7.18 ± 0.13                     | 331 ± 87 <sup>c</sup>        | 9.4 ± 2.5               | 30 ± 7 <sup>a</sup>       | 110 ± 37                                               |
|                                       | Day 3                                                                                               | 49 ± 14                   | 7.41 ± 0.05                     | 324 ± 94 <sup>c</sup>        | 6.7 ± 1.9               | 25 ± 11 <sup>a</sup>      | 89 ± 18                                                |
| Quintard, et al. <sup>[27]</sup>      | Pre-ECCO <sub>2</sub> R                                                                             | 78 ± 14                   | 7.17 ± 0.09                     | 5.9 <sup>f</sup>             | NR                      | 28 <sup>f</sup>           | 133 ± 71                                               |
|                                       | 12 hours                                                                                            | 48 ± 10                   | 7.40 ± 0.07                     | 5.6 <sup>f</sup>             | NR                      | 26 <sup>f</sup>           | 134 ± 43                                               |
| Weingart, et al. <sup>[28]</sup>      | <i>Physiological variables only reported at baseline</i>                                            |                           |                                 |                              |                         |                           |                                                        |
| Fanelli, et al., 2016 <sup>[29]</sup> | Pre-ECCO <sub>2</sub> R                                                                             | 51 ± 15                   | 7.36 ± 0.1                      | 6.2 ± 0.7                    | NR                      | 28 ± 2                    | 159 ± 34                                               |
|                                       | Day 3                                                                                               | 49 ± 11                   | 7.40 ± 0.1                      | 4.8 ± 0.7                    | NR                      | 23 ± 3                    | 176 ± 80                                               |
| Fanelli, et al., 2018 <sup>[30]</sup> | Pre-ECCO <sub>2</sub> R                                                                             | NR                        | NR                              | 7.0 ± 0.5                    | NR                      | NR                        | NR                                                     |
|                                       | Day 3                                                                                               | NR                        | NR                              | 4.8 ± 0.4                    | NR                      | NR                        | NR                                                     |
| Combes, et al. <sup>[31]</sup>        | Pre-ECCO <sub>2</sub> R                                                                             | 48 ± 9                    | 7.34 ± 0.08                     | 6.0 ± 0.2 <sup>e</sup>       | 10.2 ± 2.3 <sup>e</sup> | 27 ± 3 <sup>e</sup>       | 173 ± 61 <sup>e</sup>                                  |
|                                       | 24 hours                                                                                            | 47 ± 7 <sup>e</sup>       | 7.39 ± 0.04 <sup>e</sup>        | 4.1 ± 0.3                    | 6.0 ± 1.1               | 23 ± 3                    | 167 ± 34                                               |
| Nentwich, et al. <sup>[32]</sup>      | Pre-ECCO <sub>2</sub> R                                                                             | 66 ± 9                    | 7.20 ± 0.08                     | 6.0 ± 0.7                    | 9.6 ± 1.7               | 30 ± 4                    | 159 ± 36                                               |
|                                       | Day 3                                                                                               | 54 ± 14 <sup>e</sup>      | 7.27 ± 0.14 <sup>e</sup>        | 5.4 ± 1.1 <sup>h</sup>       | 8.5 ± 2.1 <sup>h</sup>  | 28 ± 4 <sup>e</sup>       | 151 ± 35 <sup>e</sup>                                  |
| Moerer, et al. <sup>[33]</sup>        | Pre-ECCO <sub>2</sub> R                                                                             | 34 ± 6                    | NR                              | 425 ± 51 <sup>c</sup>        | 10.1 ± 1.9              | 15 ± 4 <sup>d</sup>       | 211 ± 60                                               |
|                                       | 6 hours                                                                                             | 32 ± 3                    | NR                              | 395 ± 66 <sup>c</sup>        | 9.6 ± 2.6               | 15 ± 5 <sup>d</sup>       | NR                                                     |
| Petren, et al. <sup>[34]</sup>        | Pre-ECCO <sub>2</sub> R                                                                             | 79 ± 31                   | 7.23 ± 0.14                     | 4.8 ± 1.6                    | NR                      | 33 ± 6                    | 126 ± 59                                               |
|                                       | 24 hours                                                                                            | 49 ± 12                   | 7.40 ± 0.10                     | 4.4 ± 1.5                    | NR                      | 29 ± 4                    | 136 ± 54                                               |
| Goursand, et al. <sup>[35]</sup>      | Day 0 ECCO <sub>2</sub> R                                                                           | 43 (38 – 58)              | 7.38 (7.34 – 7.42)              | 6.1 (6.0 – 6.4)              | 10.7 (10.1 – 12.2)      | 26 (24 – 28)              | 109 (97 – 136)                                         |
|                                       | Day 1 ECCO <sub>2</sub> R                                                                           | 50 (45 – 59)              | 7.31 (7.26 – 7.35)              | 4.0 (4.0 – 4.2)              | 7.0 (6.4 – 8.4)         | 22 (20 – 26)              | 116 (83 – 161)                                         |
| Ding, et al. <sup>[36]</sup>          | Pre-ECCO <sub>2</sub> R                                                                             | 72 ± 17 <sup>e</sup>      | NR                              | 5.9 ± 0.2                    | NR                      | 34 ± 7                    | NR                                                     |
|                                       | 24 hours                                                                                            | 65 ± 17 <sup>e</sup>      | NR                              | 5.1 ± 0.4 <sup>e</sup>       | NR                      | 26 ± 3 <sup>e</sup>       | NR                                                     |

<sup>a</sup> – Reported as peak inspiratory pressure.

<sup>b</sup> – Data presented as a figure, but inappropriate scaling prevented digital retrieval.

<sup>c</sup> – Reported as average tidal volume in mL.

<sup>d</sup> – Reported as mean airway pressure.

<sup>e</sup> – Digitally retrieved.

<sup>f</sup> – No metric of dispersion reported.

<sup>g</sup> – Reported as inspiratory pressure.

<sup>h</sup> – Values at 1 hour.

ECCO<sub>2</sub>R – extracorporeal membrane oxygenation; HFOV – high frequency oscillatory ventilation; NR – not reported; PaCO<sub>2</sub> – arterial partial pressure of carbon dioxide; PaO<sub>2</sub>/F<sub>i</sub>O<sub>2</sub> – arterial partial pressure of oxygen to inspired fraction of oxygen ratio; Pplat – plateau airway pressure; V<sub>E</sub> – minute volume; V<sub>T</sub> – tidal volume.

Data are presented as mean ± SD or median (IQR).

**Supplementary Table 9.** Ongoing clinical trials of ECCO<sub>2</sub>R in acute hypoxaemic respiratory failure.

| <b>Study</b>                                                                                                                              | <b>Design</b>    | <b>Start date</b> | <b>Completion date</b>      | <b>Status</b>      | <b>n total</b> | <b>Country</b> | <b>Record identifier</b> |
|-------------------------------------------------------------------------------------------------------------------------------------------|------------------|-------------------|-----------------------------|--------------------|----------------|----------------|--------------------------|
| Low-flow extracorporeal carbon dioxide removal in covid-19 associated acute respiratory distress syndrome                                 | Observational    | May, 2020         | June, 2020                  | Recruiting         | 20             | Germany        | NCT04351906              |
| Post-market study of low-flow ECCO <sub>2</sub> R using Prisma-Lung+                                                                      | Observational    | April, 2021       | June, 2022                  | Recruiting         | 50             | France         | NCT04617093              |
| Registry of the experience of extracorporeal CO <sub>2</sub> removal in intensive care units (REXECOR)                                    | Registry         | January, 2016     | June, 2022                  | Recruiting         | 200            | France         | NCT02965079              |
| ECCO <sub>2</sub> R – mechanical power study                                                                                              | Observational    | March, 2019       | March, 2024 <sup>a</sup>    | Recruiting         | 15             | Italy          | NCT03939260              |
| Use of extracorporeal CO <sub>2</sub> Removal in case of moderate to severe ARDS to apply ultraprotective mechanical ventilation strategy | Observational    | February, 2021    | November, 2021              | Recruiting         | 20             | France         | NCT04556578              |
| Ultra-protective lung ventilation with extracorporeal CO <sub>2</sub> removal for moderate ARDS (SUPERNOVA)                               | Randomised trial |                   | December, 2023 <sup>a</sup> | Not yet recruiting | 230            | France         | NCT04903262              |
| Enhanced lung protective ventilation with ECCO <sub>2</sub> R during ARDS (PROVE)                                                         | Randomised trial | May, 2018         | December, 2022              | Recruiting         | 14             | France         | NCT03525691              |

<sup>a</sup> – estimated completion date.

ECCO<sub>2</sub>R – extracorporeal carbon dioxide removal.





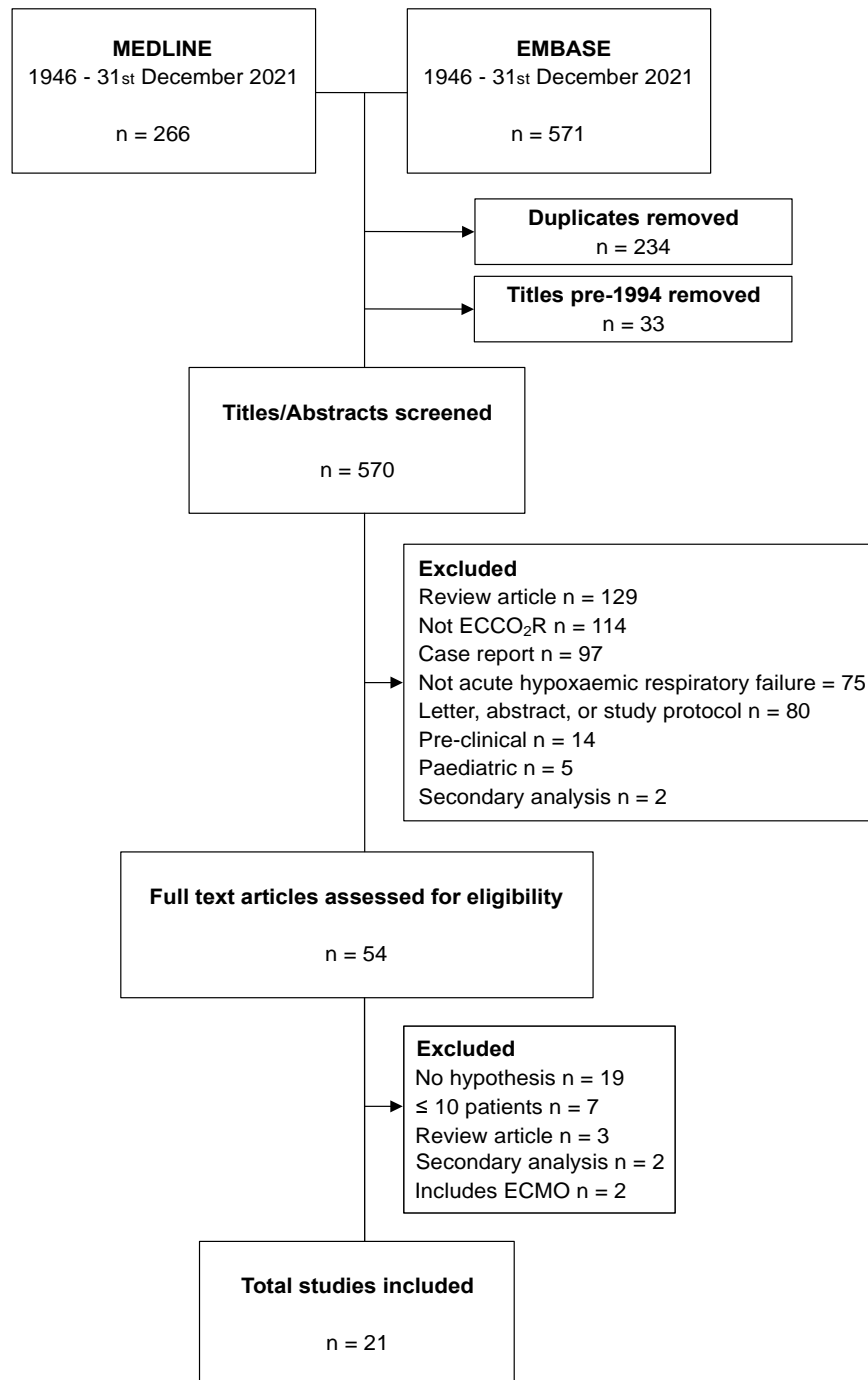

**Supplementary Figure 1. Inclusion diagram.** ECCO<sub>2</sub>R – extracorporeal carbon dioxide removal; ECMO – extracorporeal membrane oxygenation

**Risk of Bias Domains**

|                  | D1 | D2 | D3 | D4 | D5 | D6 | D7 | Overall |
|------------------|----|----|----|----|----|----|----|---------|
| Guinard, et al.  |    |    |    |    |    |    |    |         |
| Terragni, et al. |    |    |    |    |    |    |    |         |

**Domains:**

- D1: Bias due to confounding.
- D2: Bias due to selection of participants.
- D3: Bias in classification of interventions.
- D4: Bias due to deviations from intended interventions.
- D5: Bias due to missing data.
- D6: Bias in measurement of outcomes.
- D7: Bias in selection of the reported result.

**Judgement**

- Critical
- Serious
- Moderate
- Low
- No information

**Supplementary Figure 2. Risk of bias assessments for observational studies.** Performed using the Cochrane ROBINS-I. A detailed rationale for each assessment is provided in supplementary table 5.

**28-day ventilator free days**

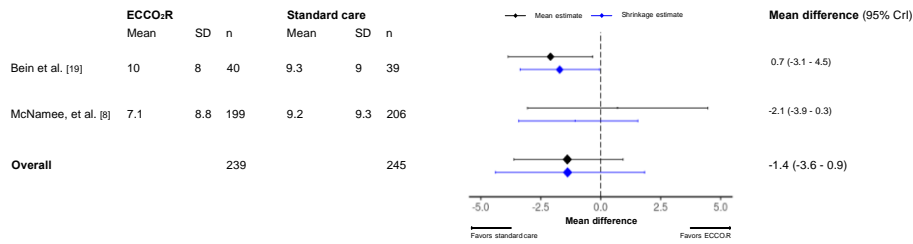

**ICU length of stay (days)**

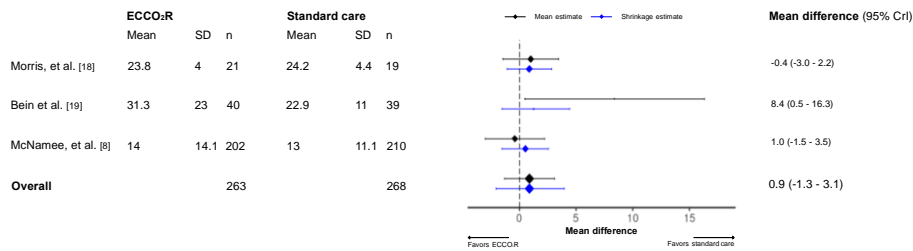

**Hospital length of stay (days)**

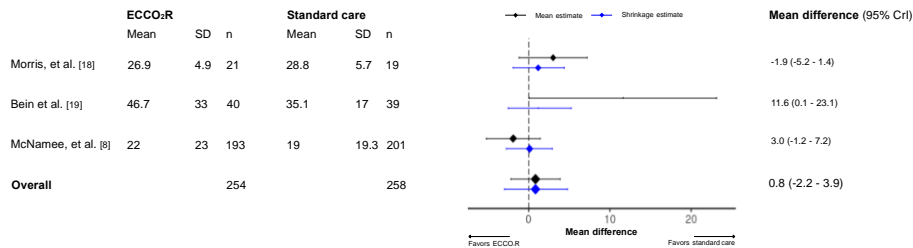

**Intracranial haemorrhage**

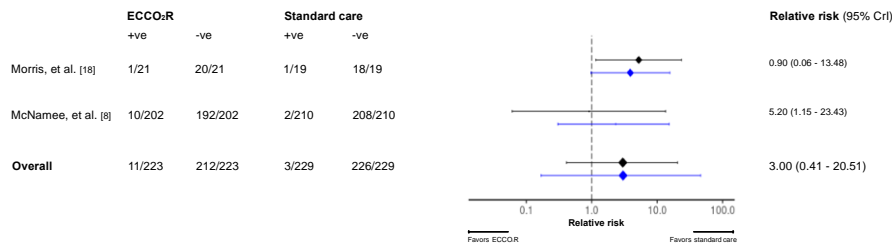

**Supplementary Figure 3. Forest plots for secondary outcomes.** Non-informative prior distributions were used for pooling secondary outcomes. Estimates are presented as relative risk or mean difference (95% credible intervals). Both mean and shrinkage estimates are shown. ECCO<sub>2</sub>R – extracorporeal carbon dioxide removal.

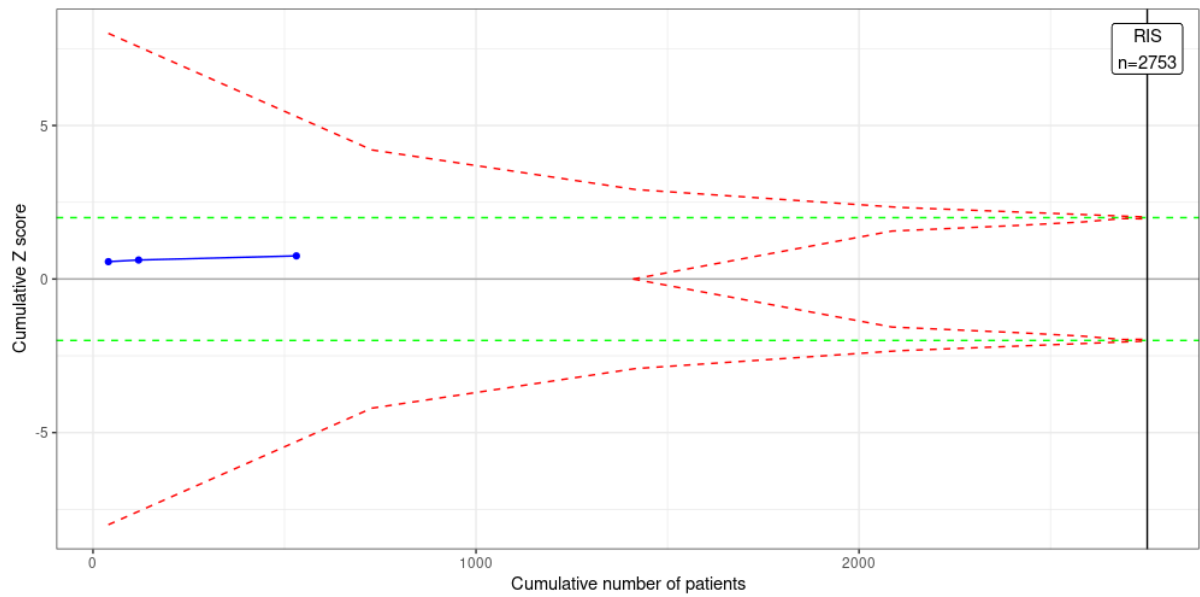

**Supplementary Figure 4. Trial sequential analysis assuming  $ARR \geq 5\%$ .** The Z-value is the test statistic where  $|Z| = 1.96$  is equivalent to  $P = 0.05$  (green line). The Z-score horizontal bounds are set with O'Brien-Fleming alpha monitoring and beta futility boundaries (red lines). The required information size (RIS) is diversity adjusted and set to detect a 5% absolute difference in mortality (from 35% to 25%) at 80% power. Two tailed  $\alpha = 0.05$  and  $\beta = 0.2$ .
